# Supplementary material
Source: HighWire-hosted journal article supplement (https://erj.ersjournals.com/content/53/5/1802014)
Supplement: inline-supplementary-material-2 [file inline-supplementary-material-2.pdf]

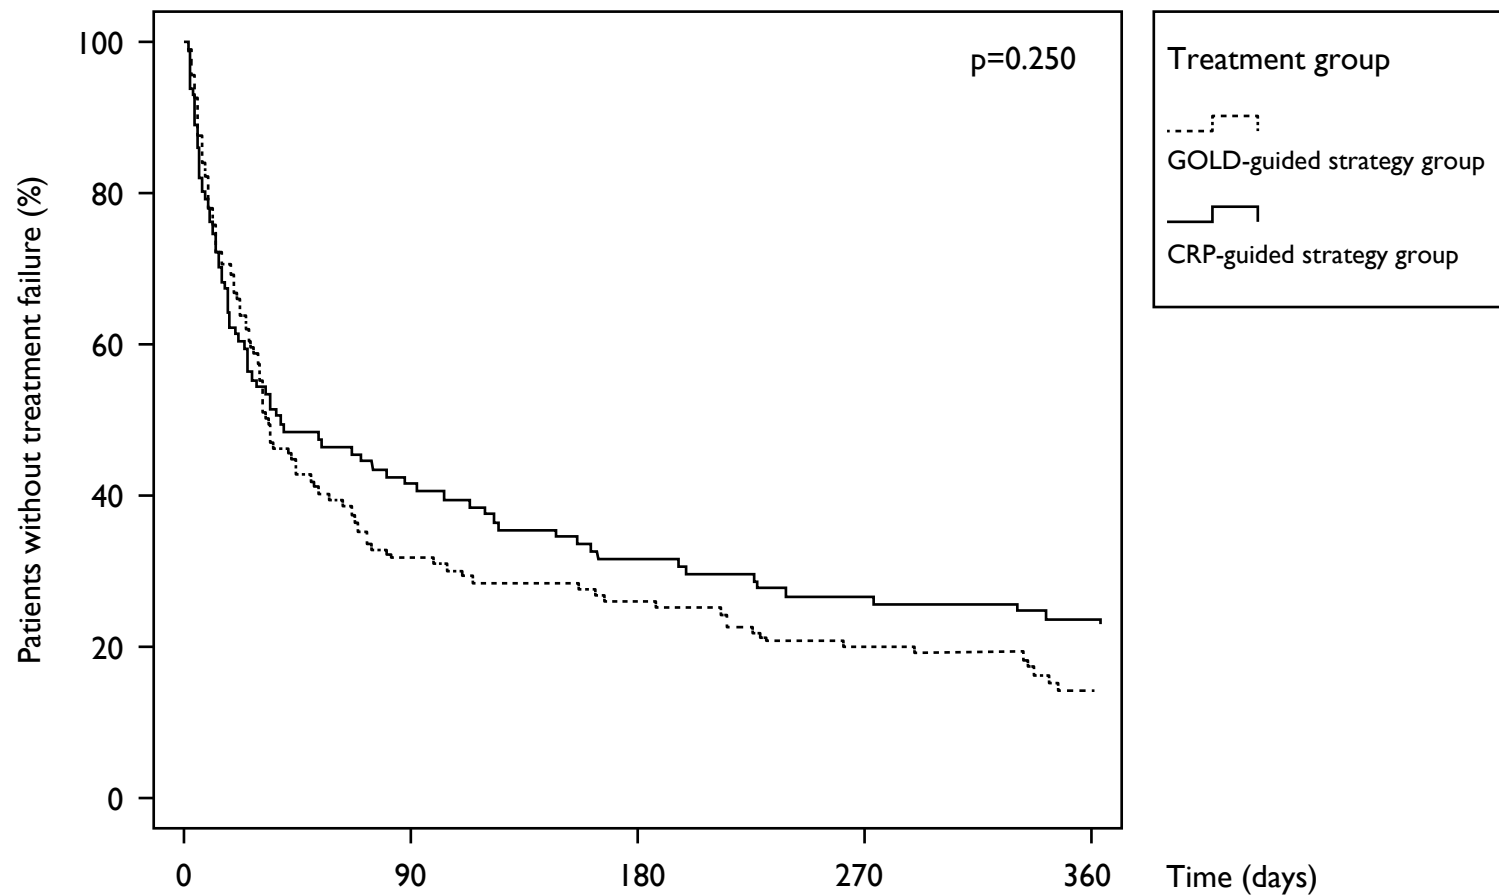

|                             |     |    |    |    |     |
|-----------------------------|-----|----|----|----|-----|
| <i>No. at risk</i>          |     |    |    |    |     |
| GOLD-guided strategy group  | 119 | 38 | 31 | 24 | 17  |
| CRP-guided strategy group   | 101 | 42 | 32 | 27 | 24  |
| <i>No. of exacerbations</i> |     |    |    |    |     |
| GOLD-guided strategy group  | 0   | 81 | 88 | 95 | 102 |
| CRP-guided strategy group   | 0   | 59 | 69 | 74 | 77  |
